# Supplementary material for: FTIR microscopy for direct observation of conformational changes on immobilized ω-transaminase: effect of water activity and organic solvent on biocatalyst performance
Source: Royal Society of Chemistry journal article supplement (doi:10.1039/d2cy01949c), 2023-01-01
Supplement: d2cy01949c1.pdf [file d2cy01949c1.pdf]

## Electronic Supplementary Information

### **FTIR microscopy for direct observation of conformational changes on immobilized $\omega$ -transaminase: effect of water activity and organic solvent on biocatalyst performance**

Iulia-Ioana Rădoi<sup>1,4</sup>, Diana Eva Bedolla<sup>2,3</sup>, Lisa Vaccari<sup>2</sup>, Anamaria Todea<sup>1</sup>, Federico Zappaterra<sup>1</sup>, Alexey Volkov<sup>4</sup>, Lucia Gardossi<sup>1</sup> †

<sup>1</sup> Department of Chemical and Pharmaceutical Sciences, University of Trieste, Via L. Giorgieri 1, 34127 Trieste TS, Italy

<sup>2</sup> Elettra-Sincrotrone Trieste S.C.p.A., Area Science Park, 34149 Basovizza TS, Italy

<sup>3</sup> AREA Science Park - Padriciano 99, IT-34149 Trieste Italy

<sup>4</sup> EnginZyme AB, Tomtebodavägen 6, 171 65 Solna, Sweden

†Corresponding author: Lucia Gardossi, e-mail: [gardossi@units.it](mailto:gardossi@units.it)

|                                                                                    |    |
|------------------------------------------------------------------------------------|----|
| Table of content                                                                   |    |
| 1. EziG specifications                                                             | 3  |
| 2. Activity assay in aqueous media of all immobilized ATA-117-His-tag formulations | 3  |
| 3. Spectroscopic characterization of EziG carriers by means of FTIR microscopy     | 4  |
| 4. Fluorescence microscopy                                                         | 6  |
| 5. FTIR investigation of the secondary structure of immobilized and pure ATA-117   | 7  |
| 6. EziG-immobilized ATA 117: activity in organic solvents                          | 9  |
| Bibliography                                                                       | 10 |

## 1. EziG specifications

Table S1. EziG carriers' specifications: all EziG products are based on controlled porosity glass.

| Carrier                  | Surface          | Particle size [ $\mu\text{m}$ ] | Pore diameter [nm] | Coating                                | pH range | Chelated $\text{Fe}^{3+}$ [ $\mu\text{mol/g}$ ] |
|--------------------------|------------------|---------------------------------|--------------------|----------------------------------------|----------|-------------------------------------------------|
| EziG <sup>1</sup> -Opal  | hydrophilic      | 75 - 125                        | 50 $\pm$ 5         | long amino alkyl chain                 | 5 - 10   | >10                                             |
| EziG <sup>2</sup> -Coral | hydrophobic      | 75 - 125                        | 30 $\pm$ 5         | polyvinyl benzyl chloride              | 5 - 10   | >10                                             |
| EziG <sup>3</sup> -Amber | semi-hydrophilic | 75 - 125                        | 30 $\pm$ 5         | copolymer of styrene and acrylonitrile | 5 - 10   | >10                                             |

All information is from EziG™ Product Data Sheet.

## 2. Activity assay in aqueous media of all immobilized ATA-117-His-tag formulations

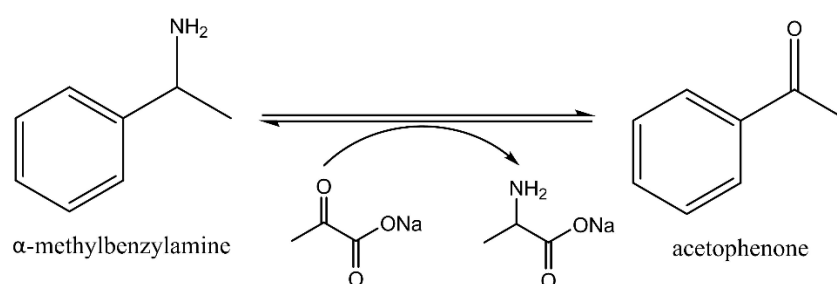

Scheme S1. Model reaction used in the spectrophotometric assay of the activity in aqueous media of all immobilized His<sub>6</sub>-ATA-117 formulations pretreated according to the protocols of Table 1 (manuscript). The reaction was monitored by following the formation of acetophenone in a microplate reader by measuring the increase in absorbance at 245 nm.

### 3. Spectroscopic characterization of EziG carriers by means of FTIR microscopy

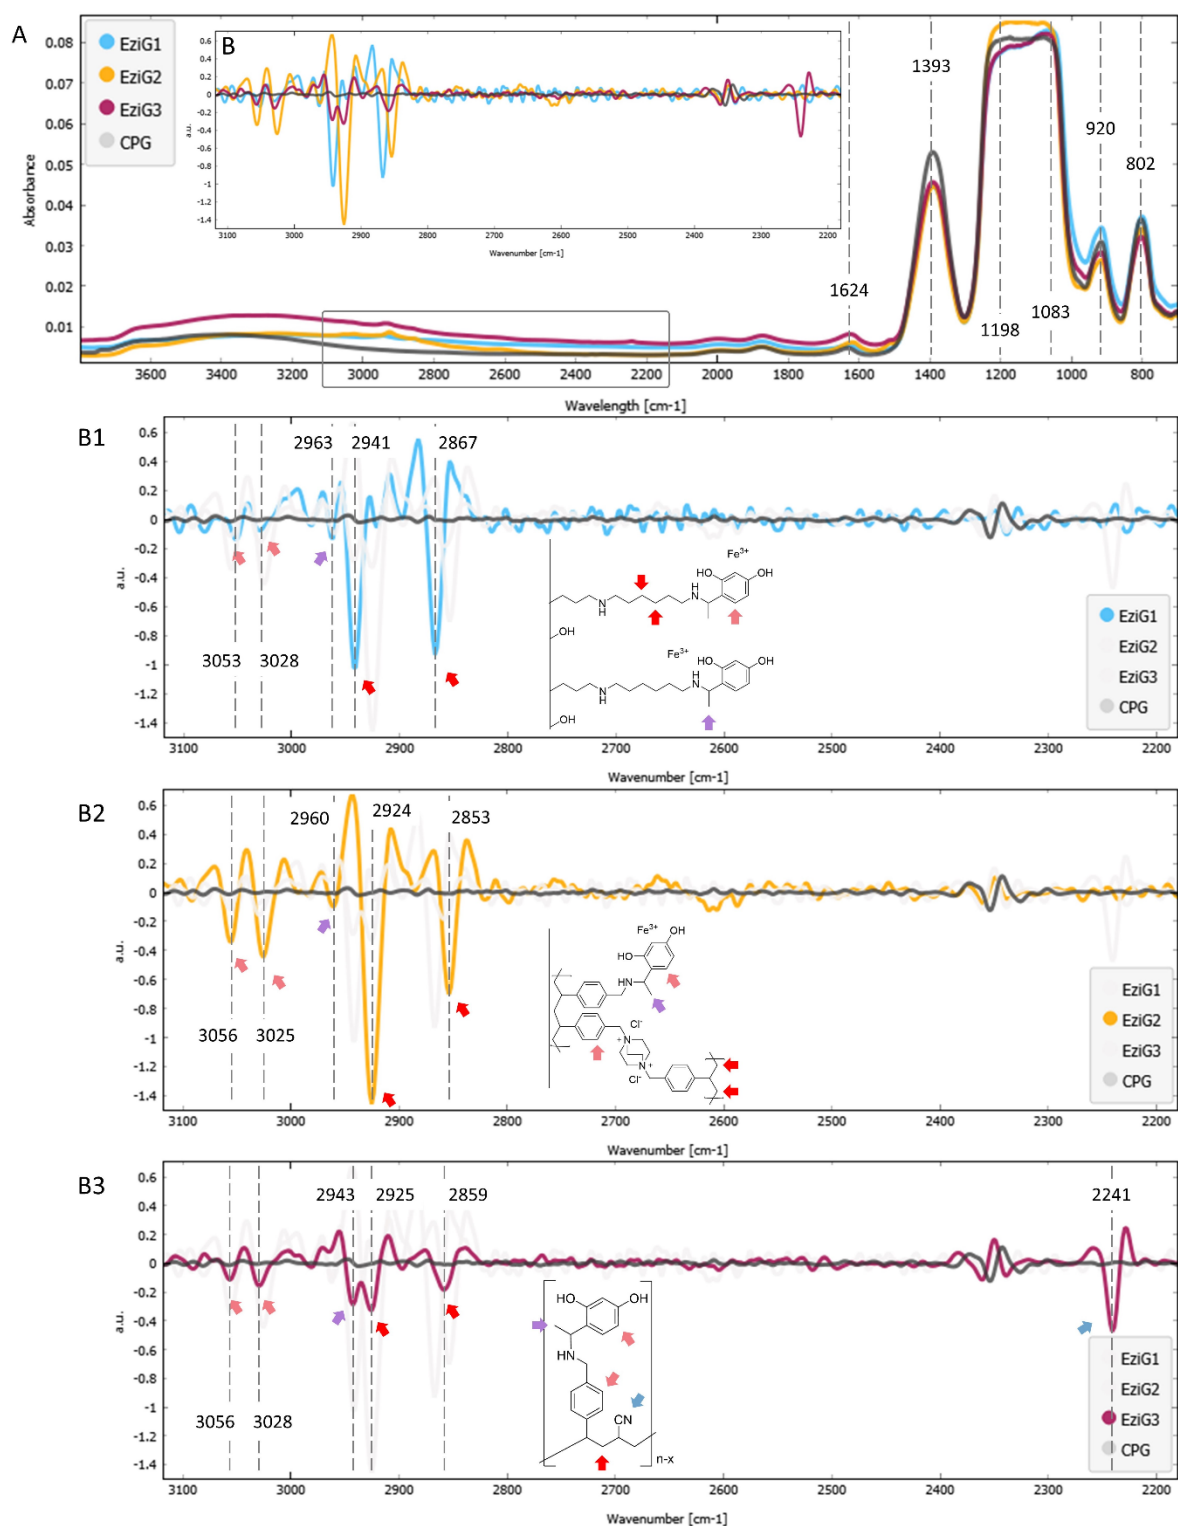

Figure S1. A: FTIR spectra (3800–700  $\text{cm}^{-1}$  region) of EziG<sup>1</sup>-Opal (blue), EziG<sup>2</sup>-Coral (orange), EziG<sup>3</sup>-Amber (dark red), and uncoated CPG (gray); black dashed lines indicate the FTIR spectral vibrations of  $\text{H}_2\text{O}$  bending at 1624  $\text{cm}^{-1}$ , B-O-B at 1393  $\text{cm}^{-1}$ , asymmetric Si-O stretching at 1198 and 1083  $\text{cm}^{-1}$ , Si-O-B stretching at 920  $\text{cm}^{-1}$  and Si-O-Si  $\text{cm}^{-1}$  stretching at 802  $\text{cm}^{-1}$ . B: Second derivative FTIR spectra (vector normalized in the spectra region 3120–2180  $\text{cm}^{-1}$ )

of the region where the most diagnostic differences are seen. In B1 (EziG<sup>1</sup>-Opal), B2 (EziG<sup>2</sup>-Coral) and B3 (EziG<sup>3</sup>-Amber) panels the main functional groups in the coating polymer composition are highlighted. Each of the spectra contains an insertion of the possible formula of the polymer coating <sup>4,5</sup>: the peaks at 3053, 3056 cm<sup>-1</sup> and 3028, 3025 cm<sup>-1</sup> were attributed to the aromatic C-H stretches; peaks at 2963, 2960 and 2943 cm<sup>-1</sup> were associated with C-H stretches in CH<sub>3</sub>; peaks at 2941, 2925, 2924 cm<sup>-1</sup> and 2087, 2859, 2853 cm<sup>-1</sup> from CH<sub>2</sub> asymmetric and symmetric stretches; the peak at 2241 cm<sup>-1</sup> that can be observed only for EziG<sup>3</sup>-Amber is attributed to C-N stretching.

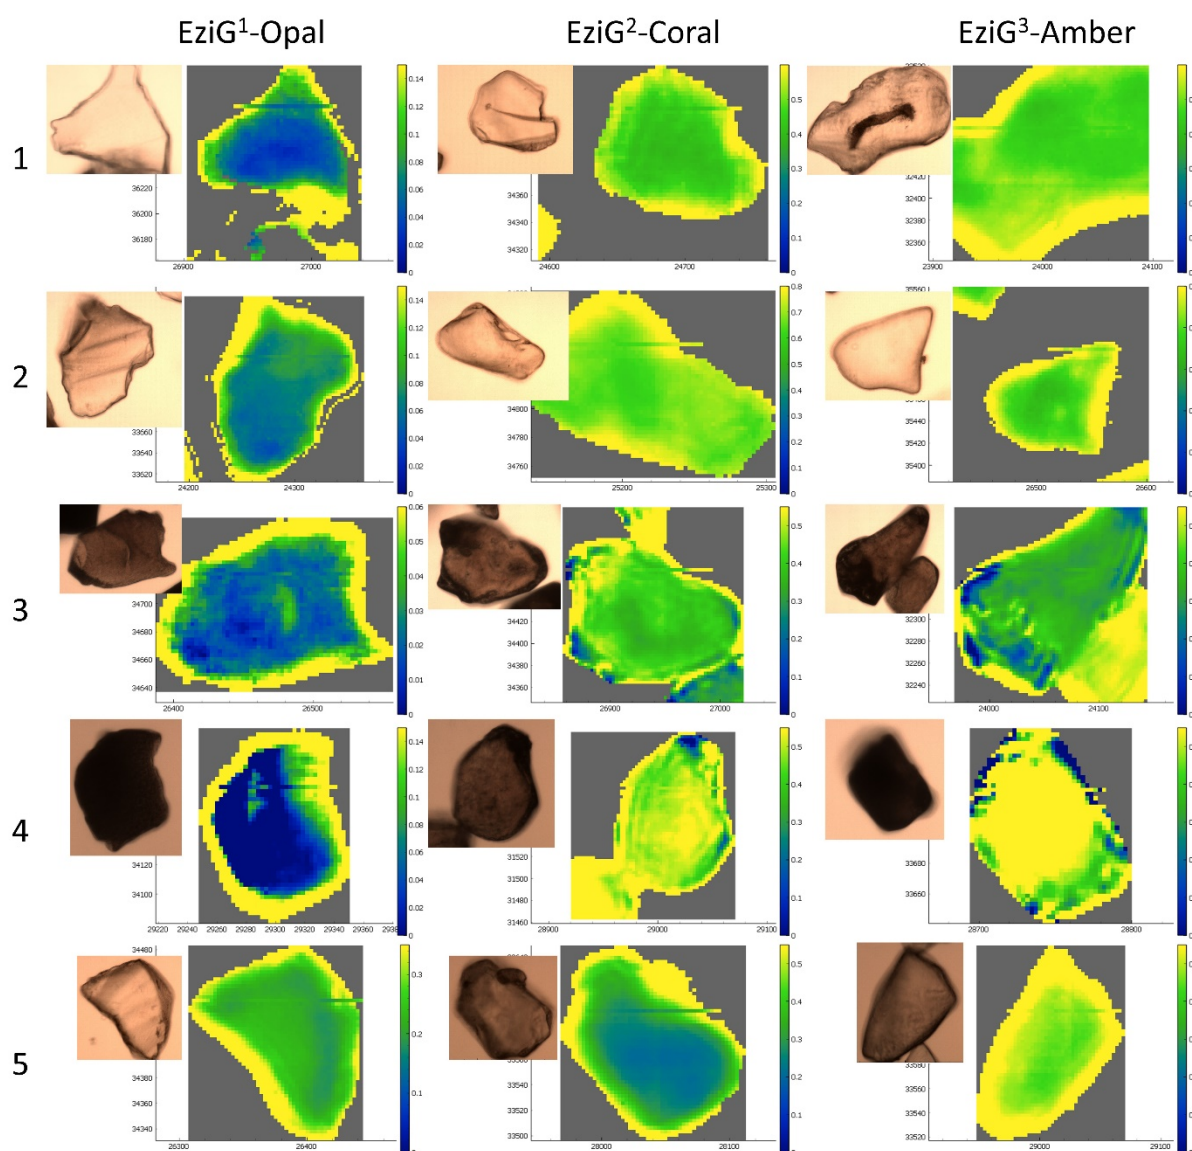

Scheme S2. The optical images of the carriers with the overlap of the chemical infrared images generated by the ratio of the integration in the specific region of Amide I and Amide II bands (~1710-1480 cm<sup>-1</sup>) and the band identifying the glass carrier (~1500-1300 cm<sup>-1</sup>). The colour scale bar ranges from higher biocatalyst concentration (yellow areas) to not-detectable concentrations (blue areas).

#### 4. Fluorescence microscopy

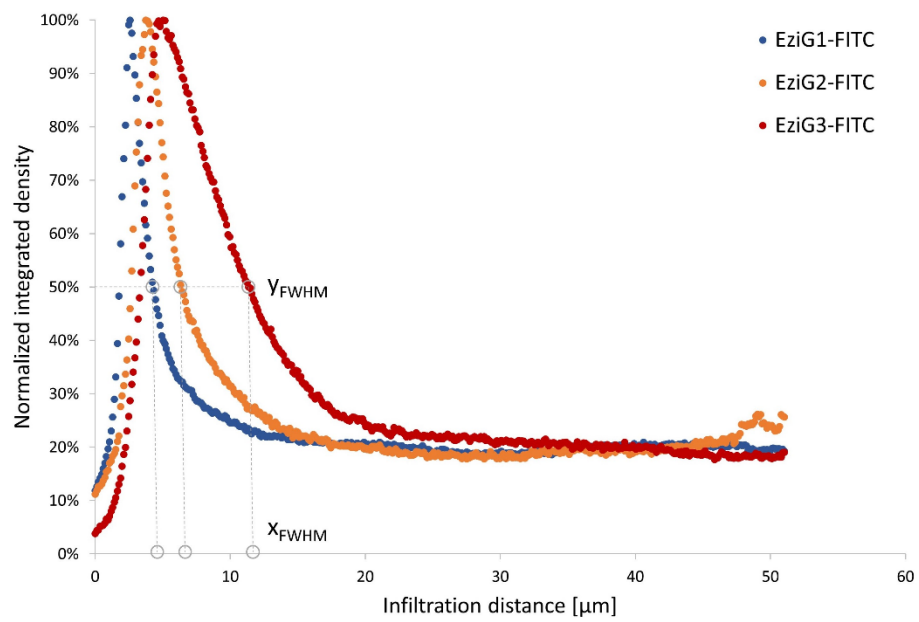

Figure S3. Radial cross-section fluorescence profile of EziG carriers shown in Figure 4.

$$FWHM = R - X_{FWHM}$$

## 5. FTIR investigation of the secondary structure of immobilized and pure ATA-117

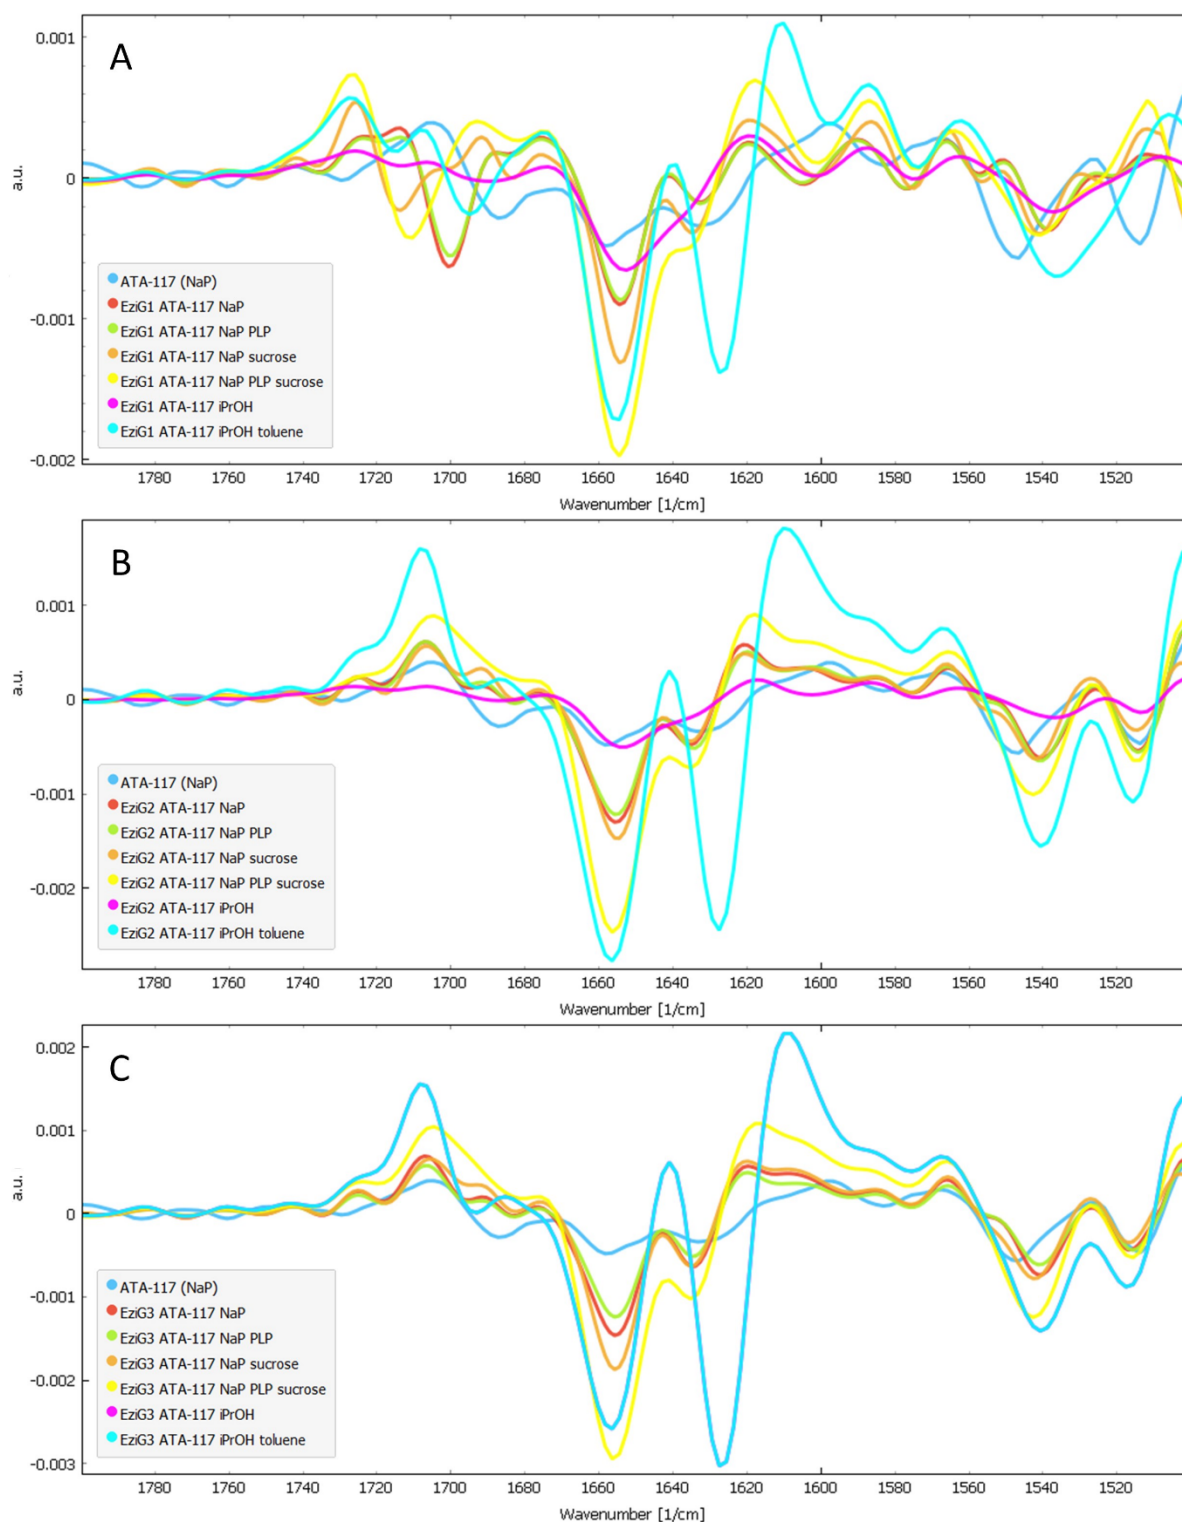

Figure S4. Savitzky-Golay's second derivative spectra for Amide I and II – comparison between different washes. The comparison was presented between native ATA-117 (resuspended in NaP buffer), immobilized ATA-117, but also the buffer used for the purification and resuspension of the enzyme. The spectra were grouped as follow: A. EziG<sup>1</sup>-Opal, B. EziG<sup>2</sup>-Coral, C. EziG<sup>3</sup>-Amber (samples were dried under vacuum at 100 mbar, 25°C for 24h).

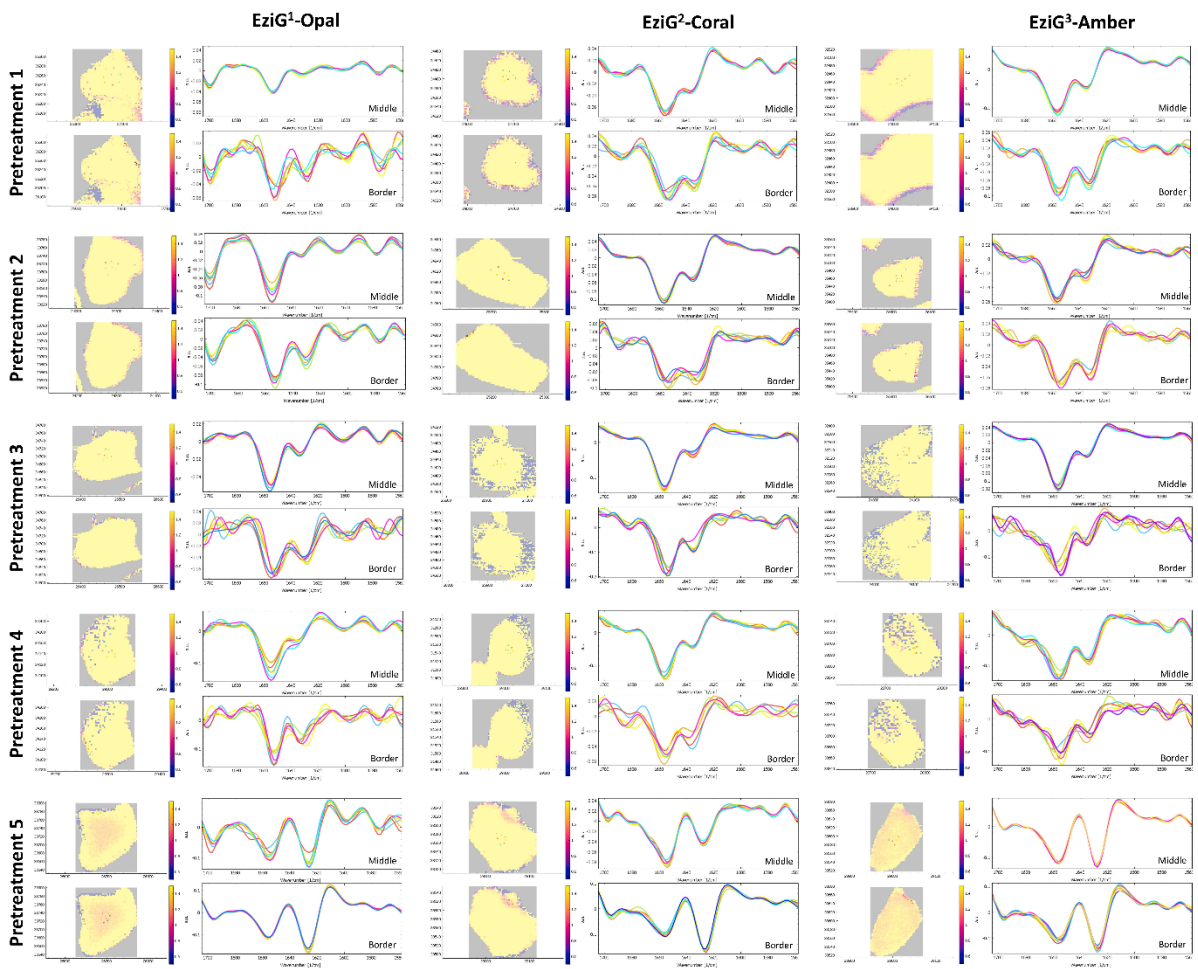

Figure S5. Savitzky-Golay's second derivative spectra for Amide I and II – comparison between different washes looking to representative spots of FRIR images at the border and at the center of the carrier. The integral from baseline of Amide I and Amide II and for the glass carrier were calculated and ratioed.



## 6. EziG-immobilized ATA 117: activity in toluene

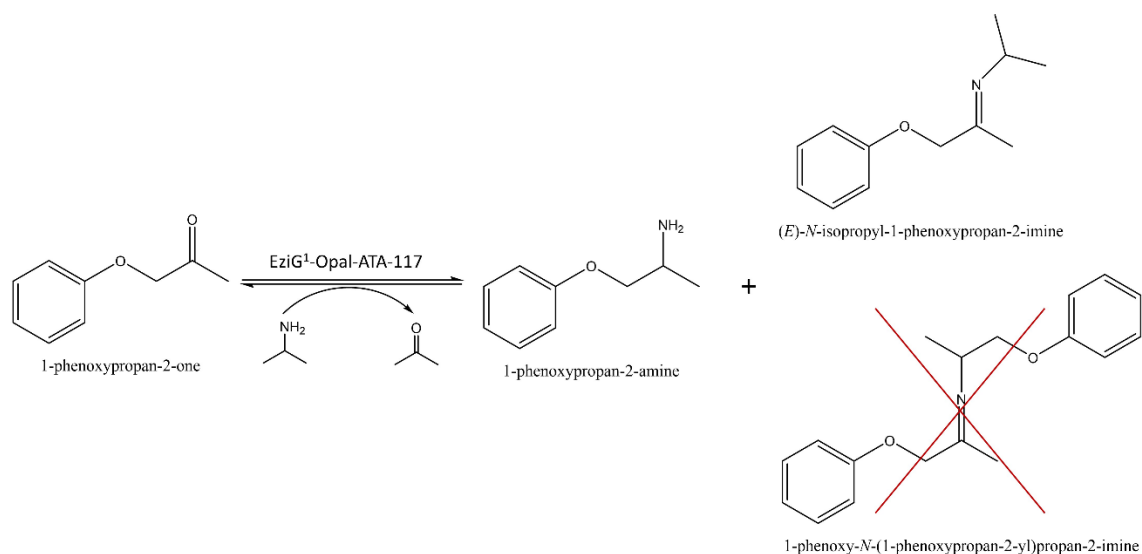

Scheme S3. Model reaction used to evaluate the effect of the water on the performance of the immobilized ATA-117 on EziG<sup>1</sup>-Opal; reaction was performed in toluene. The formation of the imine between the ketone substrate and the formed 1-phenoxypropan-2-amine was not observed.

Table S2. Values of water activity measured after 24h of equilibration of some reference mixtures. All samples were incubated in 4 mL vial at 25°C for 24h. The achievement of the equilibrium was confirmed by the constant values of  $a_w$  observed across the time (see materials and methods).

| Solvent                 | Pretreatment of EziG <sup>1</sup> -Opal-ATA-117 |                                 | $a_w$     |
|-------------------------|-------------------------------------------------|---------------------------------|-----------|
|                         | Rinse with                                      | Drying                          |           |
| <b>Control mixtures</b> |                                                 |                                 |           |
| dry toluene             | no                                              | no                              | 0.22±0.01 |
| dry toluene             | iPrOH followed by dry toluene                   | under vacuum 100mbar, 25°C, 24h | 0.22±0.01 |
| dry toluene             | iPrOH followed by dry toluene                   | no                              | 0.81±0.01 |
| water-saturated toluene | no                                              | no                              | 0.60±0.01 |

## Bibliography

- 1 L. Pang, R. Zhao, J. Chen, J. Ding, X. Chen, W. Chai, X. Cui, X. Li, D. Wang and H. Pan, *Bioact Mater*, 2022, **12**, 1–15.
- 2 A. M. E<sup>®</sup>mov and V. G. Pogareva, *Water-related IR absorption spectra for some phosphate and silicate glasses*, .
- 3 S. Y. Marzouk, R. Seoudi, D. A. Said and M. S. Mabrouk, *Opt Mater (Amst)*, 2013, **35**, 2077–2084.
- 4 M. R. Jung, F. D. Horgen, S. v. Orski, V. Rodriguez C., K. L. Beers, G. H. Balazs, T. T. Jones, T. M. Work, K. C. Brignac, S. J. Royer, K. D. Hyrenbach, B. A. Jensen and J. M. Lynch, *Mar Pollut Bull*, 2018, **127**, 704–716.
- 5 S. Krimm, C. Y. Liang and G. B. B. M. Sutherland, *J Chem Phys*, 1956, **25**, 549–562.
